# Supplementary material for: Prescribers’ Knowledge, Attitudes and Behaviors on Antibiotics, Antibiotic Use and Antibiotic Resistance in Jordan
Source: MDPI journal article supplement (doi:10.3390/antibiotics10070858), 2021-07-15
Supplement: s1 [file s1]

# Appendix 1. Survey of physicians' and dentists' knowledge and attitudes about antibiotics and antibiotic resistance.

Dear Respondent,

You are invited to complete the following survey of physicians and dentists about their knowledge and attitudes about antibiotics and antibiotic resistance.

Researchers from UK, Jordan University of Science and Technology, and Yarmouk University are seeking responses from physicians and dentists. We would really value you completing the survey that will take 5 to 10 minutes to complete. It includes predominantly multiple-choice questions.

Please feel free to cascade the link of the survey widely to colleagues.

In which language would you prefer to complete this survey? ؟ بأي لغة تفضل اتمام الاستبيان

English

Arabic

## ➤ Demographic Section

### 1. Please specify in which governorate you practice

Amman

Irbid

Salt

Zarqa

Madaba

Jerash

Ajloun

Mafrq

Karak

Tafilah

Ma'an

Aqaba

### 2. What is your core profession?

Medical doctor (e.g. general practice, surgeon, specialists, infectious disease physician)

Dentist

### 3. What is your predominant role? (i.e.>50% of your time)?

Generalist

Specialist

Academia/ Research

### 4. Where do you predominantly practice? (i.e. >50% of your time):

Hospital (any hospital type)

University (as an Academic) or research institute

Public clinic

Private clinic

**5. How many years have you been practicing in your current profession?**

0-2 years  
3-5 years  
6-10 years  
11-15 years  
16-20 years  
21-25 years  
>25 years

**6. What is your age?**

24-35 years  
36-45 years  
46-55 years  
56-65 years  
>66 years

**7. What gender do you identify with?**

Male  
Female

➤ **Knowledge about antibiotic use and antibiotic resistance**

**8. Please answer whether you believe these statements are true or false.**

|                                                                                                 | True | False | Unsure |
|-------------------------------------------------------------------------------------------------|------|-------|--------|
| Antibiotics are effective against viruses                                                       |      |       |        |
| Antibiotics are effective against cold infections                                               |      |       |        |
| Unnecessary use of antibiotics make them become ineffective                                     |      |       |        |
| Taking antibiotics has associated side effects or risks such as diarrhea, colitis, allergies    |      |       |        |
| Every person treated with antibiotics is at an increased risk of antibiotic resistant infection |      |       |        |
| Antibiotic resistant bacteria can spread from person to person                                  |      |       |        |
| Healthy people can carry antibiotic resistant bacteria                                          |      |       |        |
| The use of antibiotics to stimulate growth in farm animals is legal in Jordan                   |      |       |        |

**9. At what level do you think it is most effective to tackle resistance to antibiotics? Select no more than 2.**

Individual level (prescribers)  
Environmental/Animal Health  
Regional/National Level  
Global  
Action at all levels needed  
I do not know

**10. What strategies do you employ to prescribe antibiotics prudently? Select all that apply.**

Delayed prescribing/ back-up prescribing (delayed prescribing is a method whereby a prescription is issued by a health professional for use by the patient at a later date, if their symptoms do not improve)  
Patient education  
New patient consultation  
None

Others: \_\_\_\_\_

**11. How often do you prescribe antibiotics?**

Everyday  
Weekly  
Monthly  
Quarterly  
Yearly

❖ *For the next questions, to what extent do you agree or disagree with the following statements:*

**12. "I know what antibiotic resistance is"**

Strongly disagree  
Disagree  
Undecided  
Agree  
Strongly Agree  
I do not understand the question  
Not Applicable

**13. "I know there is a connection between my prescribing of antibiotics and emergence and spread of antibiotic resistant bacteria":**

Strongly disagree  
Disagree  
Undecided  
Agree  
Strongly Agree  
I do not understand the question  
Not Applicable

**14. "I know what information to give to individuals about prudent use of antibiotics and antibiotic resistance":**

Strongly disagree  
Disagree  
Undecided  
Agree  
Strongly Agree  
I do not understand the question  
Not Applicable

**15. "I have sufficient knowledge about how to use antibiotics appropriately for my current practice":**

Strongly disagree  
Disagree  
Undecided  
Agree  
Strongly Agree  
I do not understand the question  
Not Applicable

**16. "I have a key role in helping control antibiotic resistance":**

Strongly Disagree  
Disagree  
Undecided  
Agree  
Strongly Agree  
I do not understand the question  
Not applicable

**17. "I have easy access to guidelines I need on managing infections":**

Strongly Disagree  
Disagree  
Undecided  
Agree  
Strongly Agree  
I do not understand the question  
Not applicable

**18. "I have easy access to the materials I need to give advice on prudent antibiotic use and antibiotic resistance":**

Strongly Disagree  
Disagree  
Undecided  
Agree  
Strongly Agree  
I do not understand the question  
Not applicable

**19. "I have good opportunities to provide advice on prudent antibiotic use to individuals":**

Strongly disagree  
Disagree  
Neutral  
Agree  
Strongly agree  
I do not understand the question

**20. "Environmental factors such as wastewater in the environment are important in contributing to antibiotic resistance in bacteria from humans"?**

Strongly disagree  
Disagree  
Neutral  
Agree  
Strongly agree  
I do not understand the question

**21. "Excessive use of antibiotics in livestock and food production is important in contributing to antibiotic resistance in bacteria from humans"?**

Strongly Disagree  
Disagree

Undecided  
Agree  
Strongly Agree  
I do not understand the question

**22. "I am confident making antibiotic prescribing decisions"?**

Strongly Disagree  
Disagree  
Undecided  
Agree  
Strongly Agree  
I do not understand the question

**23. "I have confidence in the antibiotic guidelines available to me":**

Strongly Disagree  
Disagree  
Undecided  
Agree  
Strongly Agree  
I do not understand the question

**24. " I consider antibiotic resistance when treating a patient ":**

Strongly Disagree  
Disagree  
Undecided  
Agree  
Strongly Agree  
I do not understand the question

**25. I feel supported to not prescribe antibiotics when they are not necessary**

Strongly Disagree  
Disagree  
Undecided  
Agree  
Strongly Agree  
I do not understand the question

❖ *Please answer the following questions, considering the last one week only in your clinical practice:*

**26. How often did you prescribe antibiotics during the last one week?**

Once a day  
More than once a day  
Once a week  
More than once a week  
rarely  
never  
I do not remember  
Not Applicable

**27. How often did you give out resources (e.g. leaflets or pamphlets) on prudent antibiotic use or management of infections to individuals during the last one week?**

Once a day  
More than once a day  
Once a week  
More than once a week  
rarely  
never  
I do not remember  
Not Applicable

**28. How often did you give out advice related to prudent antibiotic use or management of infections to an individual during the last one week?**

Once a day  
More than once a day  
Once a week  
More than once a week  
Rarely  
Never  
I do not remember

**29. How often would you have preferred not to prescribe an antibiotic but were not able during the last one week?**

Once a day  
More than once a day  
Once a week  
More than once a week  
Rarely  
Never  
I do not remember

**30. How often did the fear of patient deterioration or fear of complications lead you to prescribe antibiotics during the last one week?**

Once a day  
More than once a day  
Once a week  
More than once a week  
Rarely  
Never  
I do not remember

**31. How often did you prescribe antibiotics because it took less time than to explain the reason why they are not indicated during the last one week?**

Once a day  
More than once a day  
Once a week  
More than once a week  
Rarely  
Never

I do not remember

**32. How often did you prescribe antibiotics in situations in which it is impossible for you to conduct a follow-up of the patient during the last one week?**

Once a day  
More than once a day  
Once a week  
More than once a week  
Rarely  
Never  
I do not remember

**33. How often did you stop an antibiotic prescription earlier than the prescribed course length during the last one week?**

Once a day  
More than once a day  
Once a week  
More than once a week  
Rarely  
Never  
I do not remember

**34. How often did you prescribe an antibiotic to maintain the relationship with the patient during the last one week?**

Once a day  
More than once a day  
Once a week  
More than once a week  
Rarely  
Never  
I do not remember

**35. How often did you prescribe an antibiotic because you were uncertain about the diagnosis of infection during the last one week?**

Once a day  
More than once a day  
Once a week  
More than once a week  
Rarely  
Never  
I do not remember

**36. How often did you prescribe a shorter course of treatment as compared to available guidelines during the last one week?**

Once a day  
More than once a day  
Once a week  
More than once a week  
Rarely  
Never

I do not remember

**37. How often did you discontinue early (within three days after initiation) a treatment because bacterial infection was not likely after all during the last one week**

Once a day

More than once a day

Once a week

More than once a week

Rarely

Never

I do not remember
